# Supplementary material for: Rhubarb Enema Attenuates Renal Tubulointerstitial Fibrosis in 5/6 Nephrectomized Rats by Alleviating Indoxyl Sulfate Overload
Source: PubMed Central journal article supplement (PMC4684395; doi:10.1371/journal.pone.0144726), 2015-12-15
Supplement: pone.0144726.s001.pdf [file pone.0144726.s001.pdf]

## 广东省中医院实验动物伦理委员会对动物实验研究的审查结果

|                                                                                                                                          |                                                                                     |          |                                     |
|------------------------------------------------------------------------------------------------------------------------------------------|-------------------------------------------------------------------------------------|----------|-------------------------------------|
| 一、实验项目基本情况：                                                                                                                              |                                                                                     |          |                                     |
| 实验项目名称                                                                                                                                   | 基于肠肾轴理论模型探讨大黄结肠给药改善肾间质纤维化的机制研究                                                      | 编号       | 2013011                             |
| 动物来源                                                                                                                                     |                                                                                     | 品种品系     | SD 大鼠                               |
| 申请单位                                                                                                                                     |                                                                                     |          |                                     |
| 联系人                                                                                                                                      | 邹川                                                                                  | 联系电话     |                                     |
| 实验目的                                                                                                                                     | 基于肠肾轴理论模型探讨大黄结肠给药改善肾间质纤维化的机制研究                                                      |          |                                     |
| 二、伦理委员会讨论内容：                                                                                                                             |                                                                                     |          |                                     |
| 参加动物实验研究者资格：                                                                                                                             | <input checked="" type="checkbox"/> 符合条件                                            | 2、不符合条件  |                                     |
| 提供的动物伦理审查材料：                                                                                                                             | <input checked="" type="checkbox"/> 符合条件                                            | 2、不符合条件  |                                     |
| 动物实验的必要性：                                                                                                                                | <input checked="" type="checkbox"/> 1、必要                                            | 2、不必要    |                                     |
| 是否符合动物福利原则：                                                                                                                              |                                                                                     | 1、是      | 2、否                                 |
| 动物实验的环境条件是否符合国家标准：                                                                                                                       | <input checked="" type="checkbox"/> 是                                               | 2、否      |                                     |
| 实验方案：                                                                                                                                    | <input checked="" type="checkbox"/> 合理                                              | 2、基本合理   | 3、不合理                               |
| 三、伦理委员会审议情况：                                                                                                                             |                                                                                     |          |                                     |
| 应到会委员数：9人                                                                                                                                | 实际到会委员数：5人                                                                          | 未到委员及原因： |                                     |
| 会议地点：                                                                                                                                    |                                                                                     |          |                                     |
| <div style="text-align: center;">  <p>同意实验</p> </div> |                                                                                     | 曾星       | <input checked="" type="checkbox"/> |
|                                                                                                                                          |                                                                                     | 丘小惠      |                                     |
|                                                                                                                                          |                                                                                     | 邓时贵      | <input checked="" type="checkbox"/> |
|                                                                                                                                          |                                                                                     | 李慧       | <input checked="" type="checkbox"/> |
|                                                                                                                                          |                                                                                     | 孙景波      | <input checked="" type="checkbox"/> |
|                                                                                                                                          |                                                                                     | 余谊君      |                                     |
|                                                                                                                                          |                                                                                     | 何建强      | <input checked="" type="checkbox"/> |
|                                                                                                                                          |                                                                                     | 韩凌       |                                     |
| 郑广娟                                                                                                                                      |                                                                                     |          |                                     |
| 主任或副主任签名                                                                                                                                 |  |          |                                     |

2013 年 2 月 11 日
