# Supplementary material for: Rhubarb Enema Attenuates Renal Tubulointerstitial Fibrosis in 5/6 Nephrectomized Rats by Alleviating Indoxyl Sulfate Overload
Source: PubMed Central journal article supplement (PMC4684395; doi:10.1371/journal.pone.0144726), 2015-12-15
Supplement: pone.0144726.s002.pdf [file pone.0144726.s002.pdf]

Review result of Animal Study

Review result of Animal Study performed by Animal Ethical Review Committee of Guangdong Province Hospital Traditional Chinese Medicine

|                                                                                                                                                                                                    |                                                                                                                                   |                                                                                     |                                                    |
|----------------------------------------------------------------------------------------------------------------------------------------------------------------------------------------------------|-----------------------------------------------------------------------------------------------------------------------------------|-------------------------------------------------------------------------------------|----------------------------------------------------|
| 1. Basic Information of the Research Project                                                                                                                                                       |                                                                                                                                   |                                                                                     |                                                    |
| Project Name                                                                                                                                                                                       | The study on the mechanism of improving renal interstitial fibrosis with rhubarb enema based on the theory of the gut-kidney axis |                                                                                     | Number 2013011                                     |
| Source of animals                                                                                                                                                                                  |                                                                                                                                   | Species or strain                                                                   | SD Rat                                             |
| Institute of Application                                                                                                                                                                           |                                                                                                                                   |                                                                                     |                                                    |
| Contact Person                                                                                                                                                                                     | Chuan Zou                                                                                                                         | Phone number                                                                        |                                                    |
| Purpose of Study                                                                                                                                                                                   | Exploring the mechanism of improving renal interstitial fibrosis with rhubarb enema based on the theory of the gut-kidney axis    |                                                                                     |                                                    |
| 2. The Content of the Ethical Review                                                                                                                                                               |                                                                                                                                   |                                                                                     |                                                    |
| Qualifications of the Researchers of Animal Study                                                                                                                                                  | <input checked="" type="checkbox"/> Accord with regulations                                                                       | 2、 Not accord with regulations                                                      |                                                    |
| Documents for ethical review                                                                                                                                                                       | <input checked="" type="checkbox"/> Accord with regulations                                                                       | 2、 Not accord with regulations                                                      |                                                    |
| Necessity of animal study                                                                                                                                                                          | <input checked="" type="checkbox"/> 1、 Necessary                                                                                  | 2、 Not Necessary                                                                    |                                                    |
| Accordance with the principle of animal welfare                                                                                                                                                    |                                                                                                                                   |                                                                                     | 1、 Yes      2、 No                                  |
| Accordance of the animal environment with the national standard                                                                                                                                    |                                                                                                                                   |                                                                                     | <input checked="" type="checkbox"/> Yes      2、 No |
| Research plan                                                                                                                                                                                      | <input checked="" type="checkbox"/> Very Reasonable                                                                               | 2、 Basically reasonable                                                             | 3、 Not Reasonable                                  |
| 3. The Record of the Ethical Review Meeting                                                                                                                                                        |                                                                                                                                   |                                                                                     |                                                    |
| Number of committee members supposed to come 9                                                                                                                                                     | Number of committee members actually come 5                                                                                       | Reason for absence                                                                  |                                                    |
| Meeting Location                                                                                                                                                                                   |                                                                                                                                   |                                                                                     |                                                    |
| 4. Conclusion of Ethical Review                                                                                                                                                                    |                                                                                                                                   | 曾星                                                                                  | <input checked="" type="checkbox"/>                |
|  <p>Seal of the Animal Ethical Review Committee of Guangdong Province Hospital Traditional Chinese Medicine</p> |                                                                                                                                   | 丘小惠                                                                                 | <input checked="" type="checkbox"/>                |
|                                                                                                                                                                                                    |                                                                                                                                   | 邓时贵                                                                                 | <input checked="" type="checkbox"/>                |
|                                                                                                                                                                                                    |                                                                                                                                   | 李慧                                                                                  | <input checked="" type="checkbox"/>                |
|                                                                                                                                                                                                    |                                                                                                                                   | 孙景波                                                                                 | <input checked="" type="checkbox"/>                |
|                                                                                                                                                                                                    |                                                                                                                                   | 余谊君                                                                                 | <input type="checkbox"/>                           |
|                                                                                                                                                                                                    |                                                                                                                                   | 何建强                                                                                 | <input checked="" type="checkbox"/>                |
|                                                                                                                                                                                                    |                                                                                                                                   | 韩凌                                                                                  | <input checked="" type="checkbox"/>                |
|                                                                                                                                                                                                    |                                                                                                                                   | 郑广娟                                                                                 | <input type="checkbox"/>                           |
| Signature of Chairman or vice chairmam                                                                                                                                                             |                                                                                                                                   |  |                                                    |

2013 year 2 month 11 day
